# Supplementary material
Source: HighWire-hosted journal article supplement (https://thorax.bmj.com/content/80/1/16)
Supplement: inline-supplementary-material-1 [file inline-supplementary-material-1.pdf]

Supplemental Materials

Supplemental Table 1. Trends in the prevalence of cost-related nonadherence to medications among US adults with asthma

| Outcomes | Cost-related nonadherence to medications |                |                 | Components of cost-related nonadherence to medications |                |                 |                                    |                |                 |                                             |                |                 |
|----------|------------------------------------------|----------------|-----------------|--------------------------------------------------------|----------------|-----------------|------------------------------------|----------------|-----------------|---------------------------------------------|----------------|-----------------|
|          |                                          |                |                 | Skipped medication doses to save money                 |                |                 | Took less medication to save money |                |                 | Delayed refilling medications to save money |                |                 |
| Year     | <i>N</i> <sup>a</sup>                    | % <sup>b</sup> | SE <sup>c</sup> | <i>N</i> <sup>a</sup>                                  | % <sup>b</sup> | SE <sup>c</sup> | <i>N</i> <sup>a</sup>              | % <sup>b</sup> | SE <sup>c</sup> | <i>N</i> <sup>a</sup>                       | % <sup>b</sup> | SE <sup>c</sup> |
| 2011     | 365,090                                  | 23.2           | 1.0             | 251,569                                                | 16.0           | 0.9             | 264,111                            | 16.8           | 0.9             | 314,800                                     | 20.0           | 0.9             |
| 2012     | 335,472                                  | 21.5           | 1.2             | 236,027                                                | 15.1           | 1.0             | 252,940                            | 16.2           | 0.9             | 289,471                                     | 18.6           | 1.1             |
| 2013     | 260,221                                  | 22.7           | 1.1             | 181,723                                                | 15.9           | 1.1             | 188,594                            | 16.5           | 1.1             | 220,378                                     | 19.2           | 1.1             |
| 2014     | 233,123                                  | 19.1           | 1.0             | 154,359                                                | 12.7           | 0.9             | 169,840                            | 13.9           | 0.9             | 195,702                                     | 16.0           | 1.0             |
| 2015     | 227,013                                  | 17.6           | 1.0             | 147,725                                                | 11.5           | 0.8             | 166,063                            | 12.9           | 0.8             | 192,298                                     | 14.9           | 1.0             |
| 2016     | 240,620                                  | 17.1           | 1.0             | 155,938                                                | 11.1           | 0.9             | 157,240                            | 11.2           | 0.9             | 209,608                                     | 14.9           | 1.0             |
| 2017     | 241,160                                  | 18.1           | 1.1             | 162,317                                                | 12.2           | 1.0             | 165,248                            | 12.4           | 1.0             | 204,514                                     | 15.3           | 1.0             |
| 2018     | 231,006                                  | 16.9           | 1.0             | 155,311                                                | 11.4           | 0.9             | 151,722                            | 11.1           | 0.9             | 194,233                                     | 14.2           | 0.9             |
| 2019     | 241,720                                  | 16.8           | 1.0             | 144,591                                                | 10.1           | 0.8             | 164,640                            | 11.5           | 0.9             | 209,487                                     | 14.6           | 0.9             |
| 2020     | 228,054                                  | 15.6           | 1.1             | 139,265                                                | 9.5            | 0.8             | 149,041                            | 10.2           | 0.9             | 186,644                                     | 12.8           | 0.9             |
| 2021     | 177,955                                  | 12.5           | 0.8             | 107,119                                                | 7.5            | 0.6             | 125,158                            | 8.8            | 0.7             | 157,159                                     | 11.1           | 0.8             |
| 2022     | 204,447                                  | 13.1           | 0.9             | 113,248                                                | 7.3            | 0.7             | 122,466                            | 7.9            | 0.7             | 162,138                                     | 10.4           | 0.8             |

<sup>a</sup> *N*: The number of the weighted population.

<sup>b</sup> %: The percentage of the weighted population.

<sup>c</sup> SE: The standard error of the percentage.

**Supplemental Table 2.** Trends in the prevalence of cost-related nonadherence to medications among U.S. adults with asthma: results from the joinpoint regression analysis.

|                                                                                                          | Segment 1 |      |               | Segment 2 |      |               | Segment 3 |       |               | Full range |              |
|----------------------------------------------------------------------------------------------------------|-----------|------|---------------|-----------|------|---------------|-----------|-------|---------------|------------|--------------|
|                                                                                                          | Period    | APC  | 95% CI        | Period    | APC  | 95% CI        | Period    | APC   | 95% CI        | AAPC       | 95% CI       |
| Cost-related nonadherence to medications                                                                 | 2011-2015 | -6.5 | (-13.4, 1.1)  | 2015-2019 | -2.1 | (-15.8, 13.9) | 2019-2022 | -9.5  | (-24.3, 8.2)  | -5.0       | (-6.1, -3.8) |
| Skipped medication dose to save money                                                                    | 2011-2015 | -7.9 | (-14.8, -0.4) | 2015-2018 | -1.1 | (-27.8, 35.6) | 2018-2022 | -11.5 | (-20.6, -1.3) | -6.5       | (-7.9, -5.1) |
| Took less medication to save money                                                                       | 2011-2016 | -7.2 | (-10.8, -3.5) | 2016-2019 | -1.7 | (-22.0, 23.9) | 2019-2022 | -11.7 | (-22.1, 0.04) | -6.2       | (-7.3, -5.1) |
| Delayed refilling medications to save money                                                              | 2011-2015 | -6.7 | (-11.9, -1.2) | 2015-2019 | -1.7 | (-12.0, 9.8)  | 2019-2022 | -10.9 | (-21.4, 1.0)  | -5.1       | (-6.2, -4.0) |
| Abbreviations: APC, annual percent change; AAPC, average annual percent change; CI, confidence interval. |           |      |               |           |      |               |           |       |               |            |              |

**Supplemental Table 3.** Characteristics associated with cost-related nonadherence to medications among US adults with asthma: results from the adjusted multivariable logistic regression model

| Characteristic         | Odds ratio | 95% CI      |
|------------------------|------------|-------------|
| Age (years)            |            |             |
| >60                    | Reference  | Reference   |
| 41-60                  | 1.94       | (1.72-2.19) |
| 18-40                  | 1.81       | (1.57-2.08) |
| Sex                    |            |             |
| Male                   | Reference  | Reference   |
| Female                 | 1.48       | (1.34-1.63) |
| Race/ethnicity         |            |             |
| Non-Hispanic White     | Reference  | Reference   |
| Hispanic               | 1.03       | (0.89-1.20) |
| Non-Hispanic Black     | 0.92       | (0.82-1.04) |
| Others                 | 0.84       | (0.68-1.04) |
| Region                 |            |             |
| Northeast              | Reference  | Reference   |
| Midwest                | 1.42       | (1.25-1.61) |
| South                  | 1.42       | (1.26-1.60) |
| West                   | 1.35       | (1.19-1.54) |
| Educational level      |            |             |
| Less than high school  | Reference  | Reference   |
| High school and higher | 1.33       | (1.17-1.52) |
| Health insurance       |            |             |
| Covered                | Reference  | Reference   |
| Not covered            | 3.44       | (3.00-3.94) |
| Poverty status         |            |             |
| FPL $\geq 400\%$       | Reference  | Reference   |
| FPL 200%-<400%         | 2.40       | (2.12-2.73) |
| FPL 100%-<200%         | 2.95       | (2.55-3.42) |
| FPL <100%              | 2.26       | (1.93-2.65) |
| Work status            |            |             |
| Employed               | 1.25       | (1.12-1.40) |
| Unemployed             | Reference  | Reference   |
| Smoking status         |            |             |
| Non-smoker             | Reference  | Reference   |
| Former smoker          | 1.16       | (1.05-1.29) |

|                                |           |             |
|--------------------------------|-----------|-------------|
| Current smoker                 | 1.53      | (1.36-1.71) |
| Perceived health status        |           |             |
| Poor                           | Reference | Reference   |
| Good                           | 0.56      | (0.49-0.64) |
| Marital status                 |           |             |
| Married or living with partner | Reference | Reference   |
| Single or living alone         | 1.04      | (0.95-1.14) |
| Comorbidities, <i>n</i>        |           |             |
| 0                              | Reference | Reference   |
| 1                              | 1.23      | (1.07-1.40) |
| ≥2                             | 1.82      | (1.59-2.07) |

Abbreviations: CI, confidence interval; FPL, federal poverty level.

**Supplemental Table 4.** Characteristics associated with cost-related nonadherence to medications among US adults with asthma: results from the sensitivity analyses

| Outcomes           | Components of cost-related nonadherence to medications |             |                                    |             |                                             |             |
|--------------------|--------------------------------------------------------|-------------|------------------------------------|-------------|---------------------------------------------|-------------|
|                    | Skipped medication doses to save money                 |             | Took less medication to save money |             | Delayed refilling medications to save money |             |
| Characteristics    | Odds ratio                                             | 95% CI      | Odds ratio                         | 95% CI      | Odds ratio                                  | 95% CI      |
| Age (years)        |                                                        |             |                                    |             |                                             |             |
| >60                | Reference                                              | Reference   | Reference                          | Reference   | Reference                                   | Reference   |
| 41-60              | 1.89                                                   | (1.64-2.19) | 1.96                               | (1.72-2.24) | 2.05                                        | (1.80-2.33) |
| 18-40              | 1.67                                                   | (1.41-1.99) | 1.73                               | (1.47-2.04) | 1.95                                        | (1.67-2.27) |
| Sex                |                                                        |             |                                    |             |                                             |             |
| Male               | Reference                                              | Reference   | Reference                          | Reference   | Reference                                   | Reference   |
| Female             | 1.47                                                   | (1.30-1.67) | 1.45                               | (1.29-1.62) | 1.52                                        | (1.36-1.69) |
| Race/ethnicity     |                                                        |             |                                    |             |                                             |             |
| Non-Hispanic White | Reference                                              | Reference   | Reference                          | Reference   | Reference                                   | Reference   |
| Hispanic           | 1.12                                                   | (0.94-1.34) | 0.96                               | (0.81-1.15) | 1.00                                        | (0.86-1.17) |
| Non-Hispanic Black | 0.87                                                   | (0.76-1.01) | 0.86                               | (0.75-0.98) | 0.91                                        | (0.80-1.03) |
| Others             | 0.90                                                   | (0.71-1.15) | 0.90                               | (0.71-1.14) | 0.80                                        | (0.63-1.02) |
| Region             |                                                        |             |                                    |             |                                             |             |
| Northeast          | Reference                                              | Reference   | Reference                          | Reference   | Reference                                   | Reference   |
| Midwest            | 1.34                                                   | (1.14-1.58) | 1.36                               | (1.17-1.59) | 1.45                                        | (1.26-1.68) |
| South              | 1.32                                                   | (1.13-1.54) | 1.40                               | (1.21-1.62) | 1.46                                        | (1.28-1.67) |

|                         |           |             |  |           |             |           |             |
|-------------------------|-----------|-------------|--|-----------|-------------|-----------|-------------|
| West                    | 1.27      | (1.07-1.51) |  | 1.28      | (1.09-1.50) | 1.44      | (1.25-1.67) |
| Educational level       |           |             |  |           |             |           |             |
| Less than high school   | Reference | Reference   |  | Reference | Reference   | Reference | Reference   |
| High school and higher  | 1.21      | (1.04-1.42) |  | 1.26      | (1.08-1.46) | 1.33      | (1.16-1.54) |
| Health insurance        |           |             |  |           |             |           |             |
| Covered                 | Reference | Reference   |  | Reference | Reference   | Reference | Reference   |
| Not covered             | 3.39      | (2.93-3.92) |  | 3.43      | (2.98-3.94) | 3.36      | (2.92-3.87) |
| Poverty status          |           |             |  |           |             |           |             |
| FPL ≥400%               | Reference | Reference   |  | Reference | Reference   | Reference | Reference   |
| FPL 200%-<400%          | 2.19      | (1.87-2.57) |  | 2.20      | (1.83-2.64) | 2.45      | (2.06-2.92) |
| FPL 100%-<200%          | 2.75      | (2.30-3.28) |  | 2.77      | (2.34-3.27) | 3.04      | (2.59-3.57) |
| FPL <100%               | 2.25      | (1.86-2.73) |  | 2.29      | (1.97-2.66) | 2.54      | (2.22-2.91) |
| Work status             |           |             |  |           |             |           |             |
| Employed                | 1.21      | (1.07-1.38) |  | 1.17      | (1.04-1.32) | 1.30      | (1.15-1.45) |
| Unemployed              | Reference | Reference   |  | Reference | Reference   | Reference | Reference   |
| Smoking status          |           |             |  |           |             |           |             |
| Non-smoker              | Reference | Reference   |  | Reference | Reference   | Reference | Reference   |
| Former smoker           | 1.13      | (1.00-1.28) |  | 1.18      | (1.04-1.34) | 1.16      | (1.04-1.30) |
| Current smoker          | 1.48      | (1.29-1.69) |  | 1.63      | (1.43-1.86) | 1.59      | (1.41-1.80) |
| Perceived health status |           |             |  |           |             |           |             |
| Poor                    | Reference | Reference   |  | Reference | Reference   | Reference | Reference   |
| Good                    | 0.58      | (0.50-0.68) |  | 0.60      | (0.51-0.70) | 0.56      | (0.48-0.65) |

|                                |           |             |           |             |           |             |
|--------------------------------|-----------|-------------|-----------|-------------|-----------|-------------|
| Marital status                 |           |             |           |             |           |             |
| Married or living with partner | Reference | Reference   | Reference | Reference   | Reference | Reference   |
| Single or living alone         | 1.12      | (1.01-1.25) | 1.05      | (0.94-1.17) | 1.05      | (0.95-1.16) |
| Comorbidities, <i>n</i>        |           |             |           |             |           |             |
| 0                              | Reference | Reference   | Reference | Reference   | Reference | Reference   |
| 1                              | 1.34      | (1.13-1.58) | 1.34      | (1.15-1.56) | 1.23      | (1.07-1.42) |
| ≥2                             | 1.97      | (1.68-2.32) | 1.90      | (1.64-2.21) | 1.85      | (1.61-2.14) |

Abbreviations: CI, confidence interval; FPL, federal poverty level.

**Supplemental Table 5.** Association between cost-related nonadherence to medications and asthma-related adverse events among US adults with asthma: results from the sensitivity analyses

| Components of cost-related nonadherence to medications | Asthma-related adverse events |             |                      |             |
|--------------------------------------------------------|-------------------------------|-------------|----------------------|-------------|
|                                                        | Asthma attacks                |             | ER visits for asthma |             |
|                                                        | Odds ratio                    | 95% CI      | Odds ratio           | 95% CI      |
| Skipped medication doses to save money                 |                               |             |                      |             |
| Yes                                                    | 2.05                          | (1.84-2.28) | 1.66                 | (1.44-1.90) |
| No                                                     | Reference                     | Reference   | Reference            | Reference   |
| Took less medication to save money                     |                               |             |                      |             |
| Yes                                                    | 2.10                          | (1.90-2.33) | 1.60                 | (1.40-1.83) |
| No                                                     | Reference                     | Reference   | Reference            | Reference   |
| Delayed refilling medications to save money            |                               |             |                      |             |
| Yes                                                    | 1.96                          | (1.78-2.15) | 1.66                 | (1.46-1.89) |
| No                                                     | Reference                     | Reference   | Reference            | Reference   |

Abbreviations: CI, confidence interval; ER, emergency room.



**Supplementary Table 6.** Trends in the prevalence of cost-related nonadherence to medications among U.S. adults with asthma: stratified by the region.

|                                                            | Cost-related nonadherence to medications |                |                 |                |                |                 |                |                |                 |                |                |                 |
|------------------------------------------------------------|------------------------------------------|----------------|-----------------|----------------|----------------|-----------------|----------------|----------------|-----------------|----------------|----------------|-----------------|
| Region                                                     | Northeast                                |                |                 | Midwest        |                |                 | South          |                |                 | West           |                |                 |
| Year                                                       | N <sup>a</sup>                           | % <sup>b</sup> | SE <sup>c</sup> | N <sup>a</sup> | % <sup>b</sup> | SE <sup>c</sup> | N <sup>a</sup> | % <sup>b</sup> | SE <sup>c</sup> | N <sup>a</sup> | % <sup>b</sup> | SE <sup>c</sup> |
| 2011                                                       | 47207                                    | 15.8           | 2.2             | 80612          | 22.7           | 1.9             | 144140         | 26.9           | 1.8             | 93131          | 24.4           | 2.1             |
| 2012                                                       | 65166                                    | 19.8           | 2.9             | 78405          | 21.6           | 2.8             | 127961         | 24.5           | 1.8             | 63941          | 18.6           | 1.8             |
| 2013                                                       | 36922                                    | 15.0           | 2.1             | 59720          | 22.2           | 2.2             | 107591         | 29.2           | 2.3             | 55988          | 21.3           | 2.1             |
| 2014                                                       | 29443                                    | 13.1           | 2.2             | 63875          | 21.6           | 2.1             | 86365          | 20.1           | 1.8             | 53440          | 19.7           | 1.9             |
| 2015                                                       | 29372                                    | 13.4           | 2.0             | 62134          | 21.0           | 2.0             | 85534          | 18.6           | 1.8             | 49974          | 15.9           | 1.9             |
| 2016                                                       | 29902                                    | 10.4           | 2.2             | 53807          | 15.4           | 1.7             | 108596         | 23.9           | 2.1             | 48315          | 15.4           | 1.9             |
| 2017                                                       | 32890                                    | 13.2           | 2.2             | 68303          | 21.7           | 2.4             | 90837          | 19.0           | 1.9             | 49130          | 16.8           | 2.2             |
| 2018                                                       | 34766                                    | 13.0           | 1.9             | 54871          | 18.8           | 2.1             | 93845          | 20.4           | 2.0             | 47524          | 13.8           | 2.2             |
| 2019                                                       | 34294                                    | 12.5           | 1.7             | 59900          | 20.2           | 2.4             | 94655          | 17.8           | 1.7             | 52871          | 15.8           | 2.0             |
| 2020                                                       | 26942                                    | 10.4           | 2.0             | 42672          | 13.8           | 1.8             | 97519          | 18.1           | 1.9             | 60921          | 17.2           | 2.4             |
| 2021                                                       | 18767                                    | 7.4            | 1.3             | 45790          | 14.1           | 1.9             | 77952          | 15.5           | 1.4             | 35446          | 10.4           | 1.5             |
| 2022                                                       | 30637                                    | 9.9            | 1.5             | 45116          | 14.0           | 1.9             | 84989          | 15.3           | 1.6             | 43704          | 11.8           | 1.6             |
| <sup>a</sup> N: The number of the weighted population.     |                                          |                |                 |                |                |                 |                |                |                 |                |                |                 |
| <sup>b</sup> %: The percentage of the weighted population. |                                          |                |                 |                |                |                 |                |                |                 |                |                |                 |
| <sup>c</sup> SE: The standard error of the percentage.     |                                          |                |                 |                |                |                 |                |                |                 |                |                |                 |

**Supplementary Table 7.** Trends in the prevalence of cost-related nonadherence to medications among U.S. adults with asthma, stratified by region: results from the joinpoint regression analysis.

| Cost-related nonadherence to medications                                                                 | Segment 1 |      |              | Segment 2 |      |               | Segment 3 |       |               | Full range |              |
|----------------------------------------------------------------------------------------------------------|-----------|------|--------------|-----------|------|---------------|-----------|-------|---------------|------------|--------------|
|                                                                                                          | Period    | APC  | 95% CI       | Period    | APC  | 95% CI        | Period    | APC   | 95% CI        | AAPC       | 95% CI       |
| Region                                                                                                   |           |      |              |           |      |               |           |       |               |            |              |
| Northeast                                                                                                | 2011-2016 | -7.2 | (-19.3, 6.7) | 2016-2019 | 0.3  | (-48.5, 95.5) | 2019-2022 | -11.3 | (-38.4, 27.8) | -5.4       | (-8.2, -2.8) |
| Midwest                                                                                                  | 2011-2016 | -4.1 | (-5.3, -2.9) | 2016-2019 | 0.1  | (-6.3, 6.8)   | 2019-2022 | -12.3 | (-15.6, -8.7) | -5.3       | (-6.7, -3.9) |
| South                                                                                                    | 2011-2015 | -6.6 | (-18.9, 7.6) | 2015-2018 | -1.4 | (-42.7, 69.6) | 2018-2022 | -7.2  | (-22.6, 11.2) | -5.0       | (-7.0, -3.2) |
| West                                                                                                     | 2011-2016 | -7.6 | (-15.9, 1.6) | 2016-2020 | -0.5 | (-24.3, 30.9) | 2020-2022 | -16.6 | (-54.0, 51.3) | -5.6       | (-8.6, -3.2) |
| Abbreviations: APC, annual percent change; AAPC, average annual percent change; CI, confidence interval. |           |      |              |           |      |               |           |       |               |            |              |
